# Supplementary material for: Deliberate Self-Poisoning: Real-Time Characterization of Suicidal Habits and Toxidromes in the Food and Drug Administration Adverse Event Reporting System
Source: Springer Nature journal article supplement (doi:10.1007/s40264-022-01269-x), 2023-01-23
Supplement: MOESM1 [file 40264_2022_1269_MOESM1_ESM.pdf]

# Supplementary Material

## Deliberate self-poisoning:

real-time characterization of suicidal habits and toxidromes in the Food and Drug Administration Adverse Event Reporting System.

**Running Title:** Deliberate self-poisoning in the FAERS

**Authors:** Michele Fusaroli<sup>1</sup>, Guido Pelletti<sup>2</sup>, Valentina Giunchi<sup>1</sup>, Chiara Pugliese<sup>1</sup>, Mattia Bartolucci<sup>3</sup>, Elena Narmine Necibi<sup>4</sup>, Emanuel Raschi<sup>1</sup>, Fabrizio De Ponti<sup>1</sup>, Susi Pelotti<sup>2</sup>, Elisabetta Poluzzi<sup>1</sup>

### **Affiliations:**

<sup>1</sup>*Pharmacology Unit, Department of Medical and Surgical Sciences, University of Bologna, Bologna, Italy.*

<sup>2</sup>*Legal Medicine Unit, Department of Medical and Surgical Sciences, University of Bologna, Bologna, Italy.*

<sup>3</sup>*Department of Statistical Sciences, University of Bologna, Bologna, Italy.*

<sup>4</sup>*School of Emergency Medicine, Department of Medical and Surgical Sciences, University of Bologna, Bologna, Italy.*

**Corresponding author:** Michele Fusaroli. E-mail address: [michele.fusaroli2@unibo.it](mailto:michele.fusaroli2@unibo.it)

**Journal:** Drug Safety

**Table S1 – Query Check.** We checked the representativeness of our DSP query with a more specific query including only terms inherent in suicide. Main drugs involved contributed to similar proportions of reports between the two queries, thus supporting our choice.

| Substance    | DSP  |       | Suicidal DSP |      |
|--------------|------|-------|--------------|------|
|              | N    | %     | N            | %    |
| paracetamol  | 4235 | 10.06 | 1880         | 8.44 |
| promethazine | 1486 | 3.53  | 1402         | 6.29 |
| amlodipine   | 1433 | 3.40  | 621          | 2.91 |
| quetiapine   | 1340 | 3.18  | 701          | 3.15 |
| metformin    | 1220 | 2.90  | 608          | 2.73 |
| ibuprofen    | 1138 | 2.70  | 552          | 2.48 |
| alprazolam   | 1031 | 2.45  | 540          | 2.42 |
| varenicline  | 1002 | 2.38  | 968          | 4.34 |
| tramadol     | 996  | 2.37  | 324          | 1.45 |
| venlafaxine  | 939  | 2.26  | 525          | 2.36 |

**Table S2 – Comparison DSP reports vs any other FAERS report.** Chi-square test was performed for categorical values, and p-values were corrected for multiple comparison using the Holm-Bonferroni method.

| VARIABLE                       | DSP Reports<br>N = 42,103 |            | Other Reports<br>N = 11,685,995 |               | p-value |
|--------------------------------|---------------------------|------------|---------------------------------|---------------|---------|
|                                | N                         | %          | N                               | %             |         |
| <b>Gender</b>                  |                           |            |                                 |               | 0.089   |
| Woman                          | 22,819                    | 61.20      | 6,470,256                       | 60.76         |         |
| Man                            | 14,469                    | 38.30      | 4,177,794                       | 39.24         |         |
| Unknown                        | 4,815                     | -          | 1,037,945                       | -             |         |
| <b>Submission</b>              |                           |            |                                 |               | 0.003   |
| Direct                         | 494                       | 1.17       | 768,687                         | 6.58          |         |
| Expedited                      | 38,474                    | 91.38      | 6,026,848                       | 51.57         |         |
| Periodic                       | 3,135                     | 7.45       | 4,890,453                       | 41.85         |         |
| Unknown                        | 0                         | -          | 7                               | -             |         |
| <b>Reporter</b>                |                           |            |                                 |               | 0.003   |
| Consumer                       | 6,761                     | 17.04      | 5,172,334                       | 46.76         |         |
| Healthcare practitioner        | 4,110                     | 10.36      | 530,145                         | 4.79          |         |
| Lawyer                         | 1,042                     | 2.63       | 242,629                         | 2.19          |         |
| Other                          | 12,082                    | 30.46      | 1,641,445                       | 14.84         |         |
| Pharmacist                     | 3,142                     | 7.92       | 811,842                         | 7.34          |         |
| Physician                      | 12,534                    | 31.59      | 2,663,257                       | 24.08         |         |
| Unknown                        | 2,432                     | -          | 624,343                         | -             |         |
| <b>Age category</b>            |                           |            |                                 |               | 0.003   |
| Neonate (<28d)                 | 19                        | 0.06       | 27,070                          | 0.35          |         |
| Infant (28d-<2y)               | 50                        | 0.15       | 48,921                          | 0.63          |         |
| Child (2y-<12y)                | 160                       | 0.48       | 175,177                         | 2.25          |         |
| Teenager (12y-<18y)            | 4,088                     | 12.26      | 201,512                         | 2.59          |         |
| Adult (18y-<30y)               | 7,937                     | 23.81      | 586,176                         | 7.54          |         |
| Adult (30y-<50y)               | 11,943                    | 35.83      | 1,673,835                       | 21.52         |         |
| Adult (50y-<65y)               | 6,140                     | 18.42      | 2,325,587                       | 29.91         |         |
| Elderly (65y-<75y)             | 1,746                     | 5.24       | 1,493,709                       | 19.21         |         |
| Elderly (75y-<85y)             | 949                       | 2.85       | 946,745                         | 12.71         |         |
| Elderly (85y-<100y)            | 304                       | 0.91       | 295,284                         | 3.80          |         |
| Elderly (≥100y)                | 0                         | 0.00       | 2,305                           | 0.03          |         |
| Unknown                        | 8,767                     | -          | 3,909,674                       | -             |         |
| <b>Outcome</b>                 |                           |            |                                 |               | 0.003   |
| Death                          | 7,218                     | 17.14      | 1,071,316                       | 9.17          |         |
| Life Threatening               | 6,440                     | 15.30      | 297,138                         | 2.54          |         |
| Disability                     | 304                       | 0.72       | 212,779                         | 1.82          |         |
| Required Intervention          | 105                       | 0.25       | 53,806                          | 0.46          |         |
| Hospitalization                | 18,727                    | 44.48      | 2,357,583                       | 20.17         |         |
| Congenital                     | 9                         | 0.02       | 31,797                          | 0.27          |         |
| Other Serious                  | 7,383                     | 17.54      | 3,014,736                       | 25.80         |         |
| Non Serious                    | 1,917                     | 4.55       | 4,646,840                       | 39.76         |         |
| <b>Continent</b>               |                           |            |                                 |               | 0.003   |
| Africa                         | 155                       | 0.38       | 46,363                          | 0.41          |         |
| Antarctica                     | 0                         | 0.00       | 5                               | 0.00          |         |
| Asia                           | 3,639                     | 9.00       | 761,946                         | 6.71          |         |
| Europe                         | 19,269                    | 47.67      | 1,681,862                       | 14.81         |         |
| North America                  | 16,248                    | 40.19      | 8,490,693                       | 74.78         |         |
| Oceania                        | 763                       | 1.89       | 112,317                         | 0.99          |         |
| South America                  | 350                       | 0.87       | 261,500                         | 2.30          |         |
| Unknown                        | 1,679                     | -          | 331,309                         | -             |         |
| <b>Concomitant Alcohol</b>     | 2,201                     | 5.23       | 22,393                          | 0.19          | <0.001  |
| <b>Psychiatric Comorbidity</b> | 6,026                     | 14.31      | 701,518                         | 6.08          | <0.001  |
| <b>Weight (Kg)</b>             |                           |            |                                 |               | <0.001  |
| unknown                        |                           | 70 (58-84) |                                 | 73 (60.00-89) |         |
|                                |                           | 34,302     |                                 | 8,742,343     |         |

**Table S3 – Comparing fatal vs non-fatal DSP reports’ demographics.** Chi-square test was performed for categorical values, and p-values were corrected for multiple comparison using the Holm-Bonferroni method.

| VARIABLE                       | Fatal DSP Reports<br>N = 7,218 |        | Other DSP Reports<br>N = 34,885 |       | p-value |
|--------------------------------|--------------------------------|--------|---------------------------------|-------|---------|
| <b>Gender</b>                  |                                |        |                                 |       | <0.001  |
| Woman                          | 2,987                          | 54.83  | 19,832                          | 62.29 |         |
| Man                            | 2,461                          | 45.17  | 12,008                          | 37.71 |         |
| Unknown                        | 1,770                          | -      | 3,045                           | -     |         |
| <b>Submission</b>              |                                |        |                                 |       | 0.002   |
| Direct                         | 36                             | 0.50   | 458                             | 1.31  |         |
| Expedited                      | 6,982                          | 96.73  | 31,492                          | 90.27 |         |
| Periodic                       | 200                            | 2.77   | 2,935                           | 8.41  |         |
| <b>Reporter</b>                |                                |        |                                 |       | 0.002   |
| Consumer                       | 528                            | 8.15   | 6,233                           | 18.78 |         |
| Healthcare practitioner        | 501                            | 7.73   | 3,609                           | 10.87 |         |
| Lawyer                         | 67                             | 1.03   | 975                             | 2.94  |         |
| Other                          | 2,165                          | 33.42  | 9,917                           | 29.88 |         |
| Pharmacist                     | 959                            | 14.80  | 2,183                           | 6.58  |         |
| Physician                      | 2,259                          | 34.87  | 10,275                          | 30.96 |         |
| Unknown                        | 739                            | -      | 1,693                           | -     |         |
| <b>Age category</b>            |                                |        |                                 |       | 0.002   |
| Neonate (<28d)                 | 8                              | 0.13   | 11                              | 0.04  |         |
| Infant (28d-<2y)               | 20                             | 0.32   | 30                              | 0.11  |         |
| Child (2y-<12y)                | 31                             | 0.50   | 129                             | 0.47  |         |
| Teenager (12y-<18y)            | 263                            | 4.27   | 3,825                           | 14.08 |         |
| Adult (18y-<30y)               | 1,160                          | 18.82  | 6,777                           | 24.94 |         |
| Adult (30y-<50y)               | 2,560                          | 41.54  | 9,383                           | 34.53 |         |
| Adult (50y-<65y)               | 1,406                          | 22.81  | 4,734                           | 17.42 |         |
| Elderly (65y-<75y)             | 381                            | 6.18   | 1,365                           | 5.02  |         |
| Elderly (75y-<85y)             | 252                            | 4.09   | 697                             | 2.57  |         |
| Elderly (≥85y)                 | 82                             | 1.33   | 222                             | 0.82  |         |
| Unknown                        | 1,055                          | -      | 7,712                           | -     |         |
| <b>Outcome</b>                 |                                |        |                                 |       | -       |
| Death                          | 7,218                          | 100.00 | 0                               | 0.00  |         |
| Life Threatening               | 0                              | 0.00   | 6,440                           | 18.46 |         |
| Disability                     | 0                              | 0.00   | 304                             | 0.87  |         |
| Required Intervention          | 0                              | 0.00   | 105                             | 0.30  |         |
| Hospitalization                | 0                              | 0.00   | 18,727                          | 53.68 |         |
| Congenital                     | 0                              | 0.00   | 9                               | 0.03  |         |
| Other Serious                  | 0                              | 0.00   | 7,383                           | 21.16 |         |
| Non Specified As Serious       | 0                              | 0.00   | 1,917                           | 5.50  |         |
| <b>Continent</b>               |                                |        |                                 |       | 0.002   |
| North America                  | 4,162                          | 65.51  | 12,086                          | 35.47 |         |
| Europe                         | 1,577                          | 24.82  | 17,692                          | 51.93 |         |
| Asia                           | 442                            | 6.96   | 3,197                           | 9.38  |         |
| South America                  | 21                             | 0.33   | 329                             | 0.97  |         |
| Oceania                        | 113                            | 1.78   | 650                             | 1.91  |         |
| Africa                         | 38                             | 0.60   | 117                             | 0.34  |         |
| Unknown                        | 865                            | -      | 814                             | -     |         |
| <b>Concomitant Alcohol</b>     | 643                            | 8.91   | 1,558                           | 4.47  | <0.001  |
| <b>Psychiatric Comorbidity</b> | 693                            | 9.60   | 5,333                           | 15.29 | <0.001  |
| <b>Weight (Kgs) [IQR]</b>      | 74 [60-90]                     |        | 70 [58-83]                      |       | <0.001  |
| <b>Primary Suspects</b>        |                                |        |                                 |       |         |
| 1°                             | paracetamol 1028               | 14.24  | paracetamol 3,207               | 9.19  |         |
| 2°                             | oxycodone 426                  | 5.90   | promethazine 1,479              | 4.24  |         |
| 3°                             | bupropion 274                  | 3.80   | amlodipine 1,244                | 3.57  |         |
| 4°                             | metformin 247                  | 3.42   | quetiapine 1,207                | 3.46  |         |
| 5°                             | acetylsalicylic acid           | 3.10   | metformin 973                   | 2.79  |         |
| 6°                             | 224                            | 3.10   | varenicline 959                 | 2.75  |         |
| 7°                             | hydrocodone 224                | 2.74   | ibuprofen 953                   | 2.73  |         |
| 8°                             | diphenhydramine 198            | 2.72   | risperidone 854                 | 2.45  |         |
| 9°                             | tramadol 196                   | 2.63   | alprazolam 841                  | 2.41  |         |
| 10°                            | alprazolam 190                 | 2.62   | venlafaxine 823                 | 2.36  |         |
|                                | amlodipine 189                 |        |                                 |       |         |



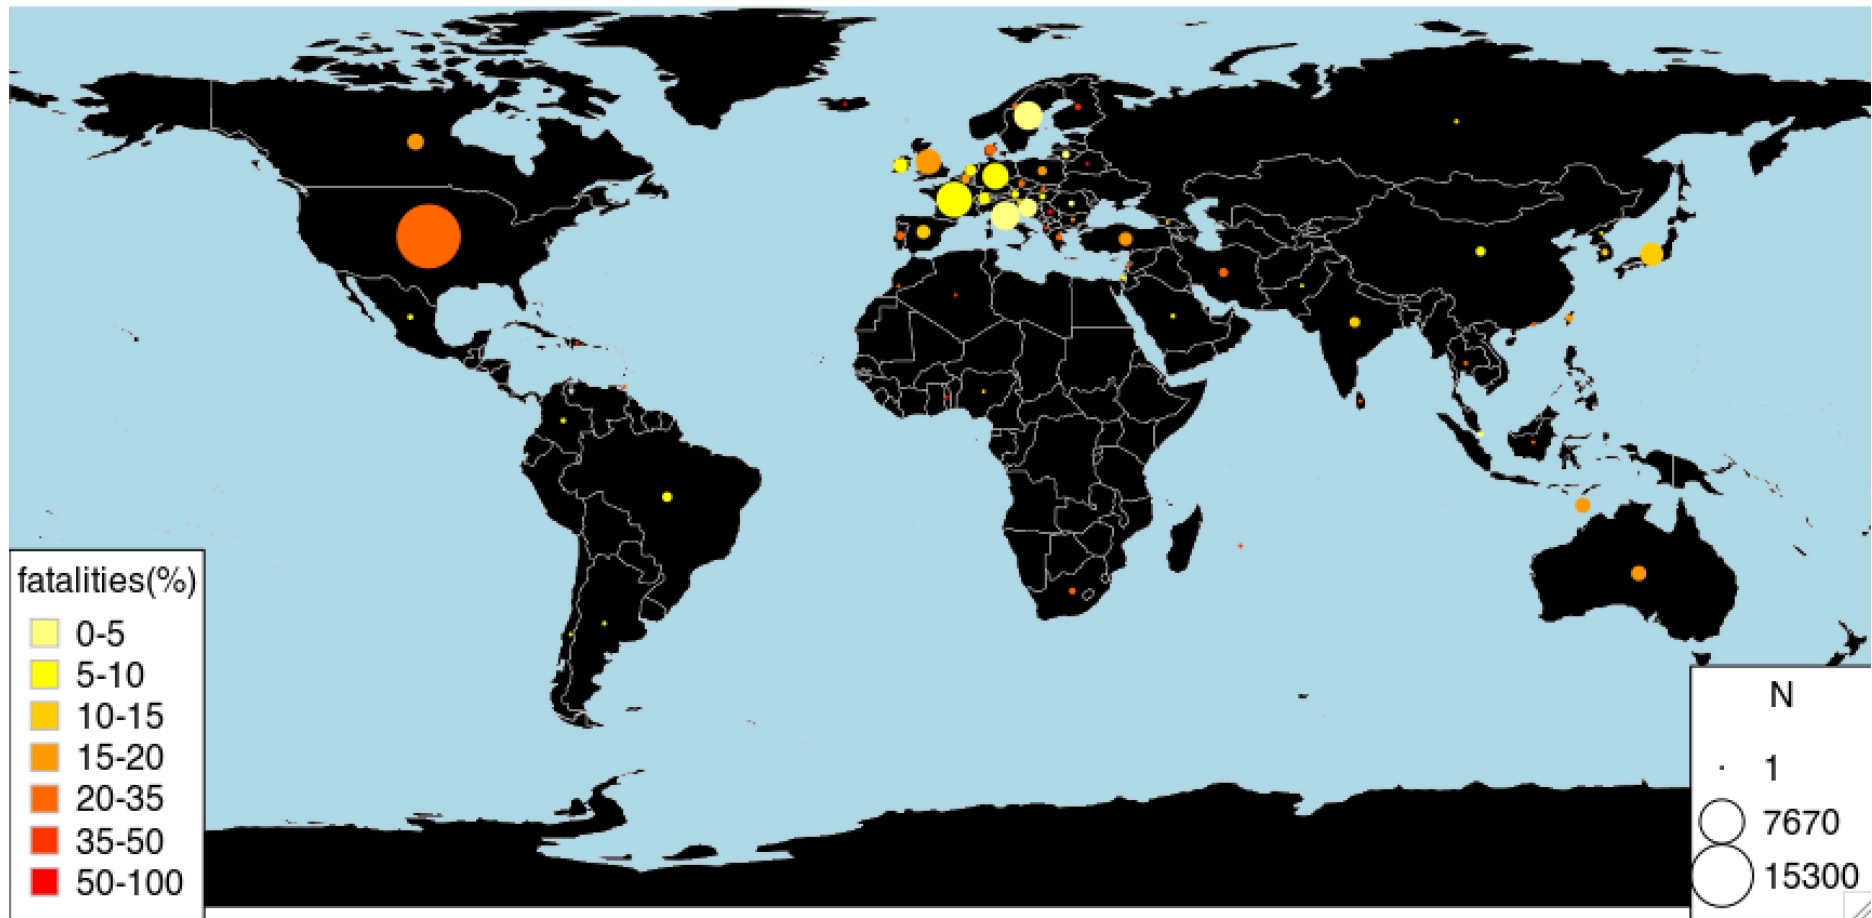

Figure S1– Geographical distribution of reports.

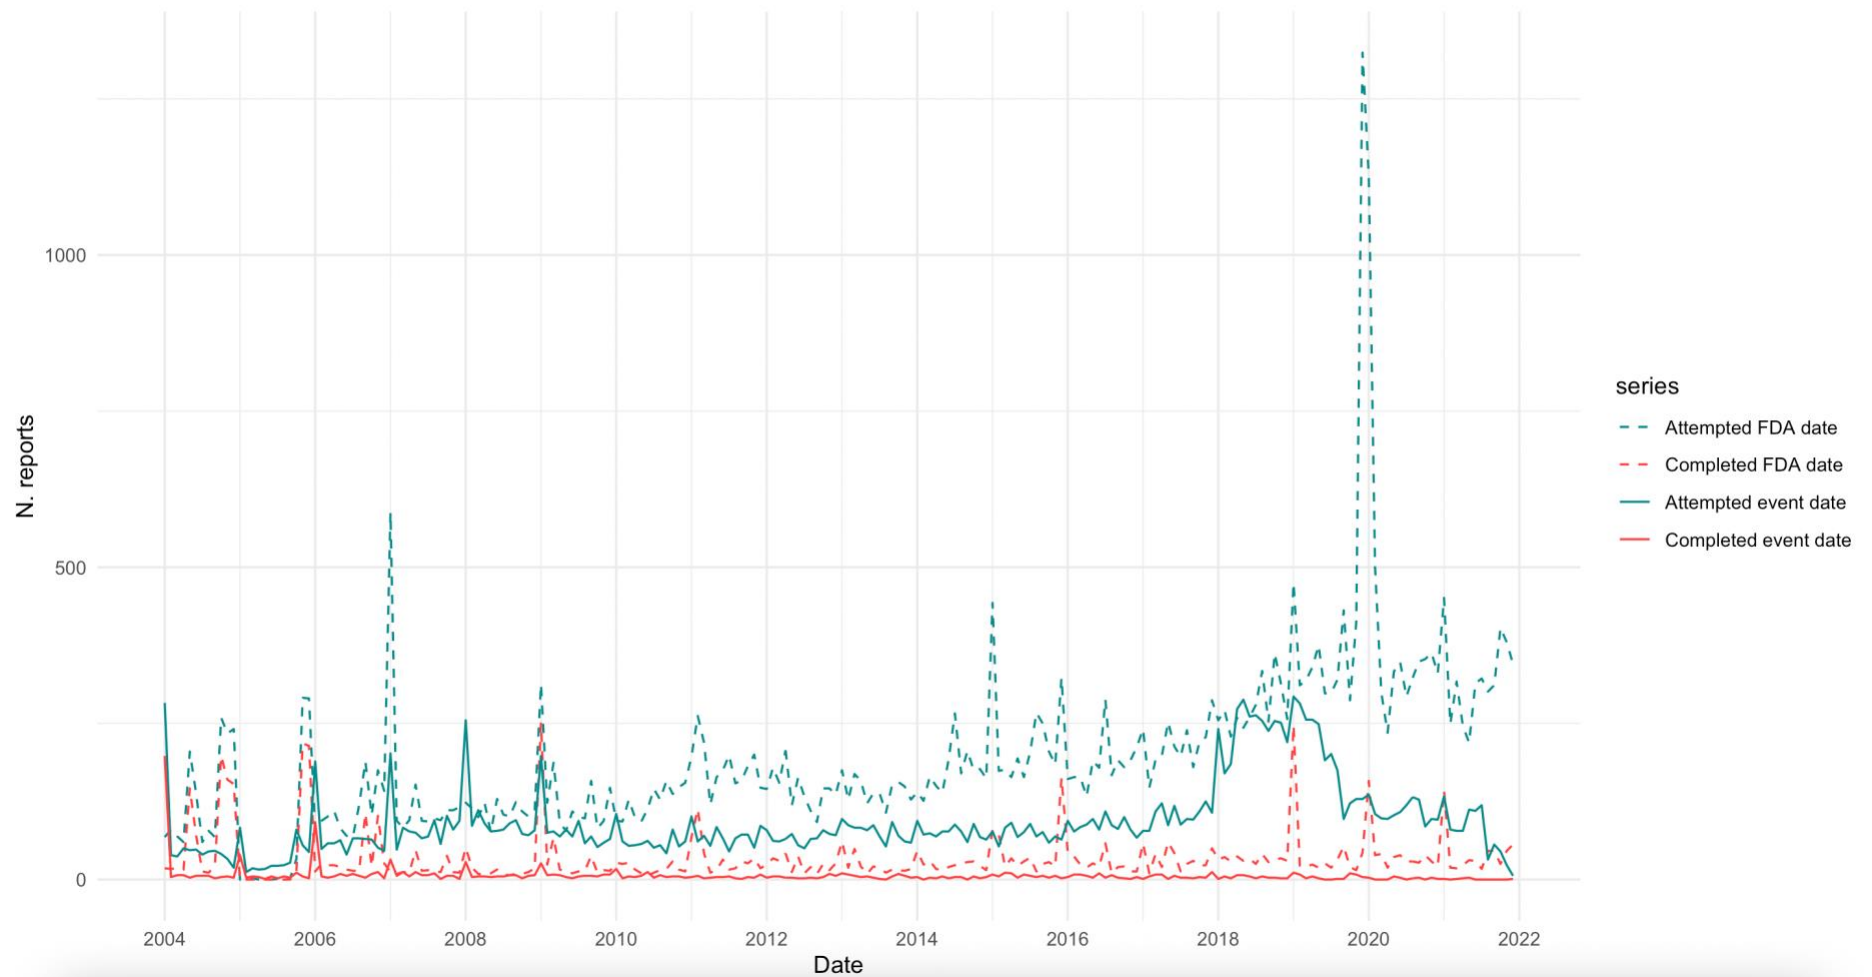

**Figure S2– Time series.** Monthly spaced time series of both attempted (in blue) and completed (in red) events, both referring to the submission date (dashed line) and to the event date (continuous line). The vertical lines, marking the January of every year, suggest a seasonal behavior of DSP reports.

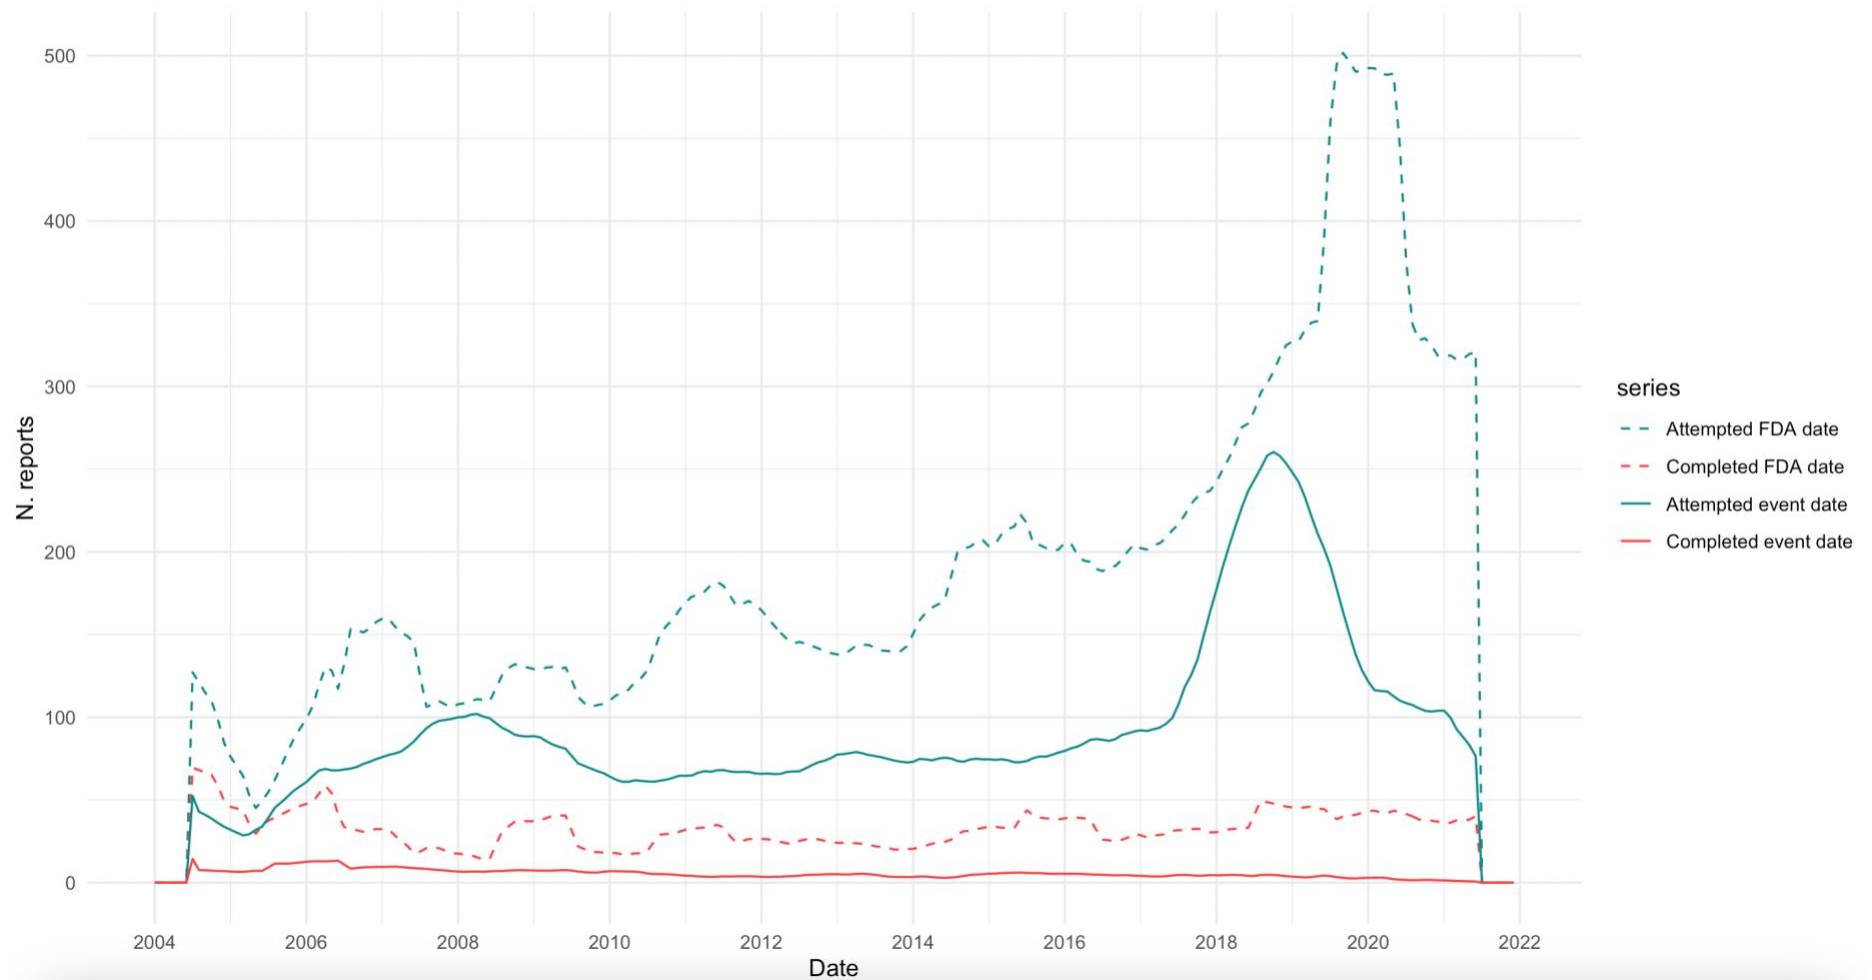

**Figure S3– Temporal trends.** Trend-cycle components, estimated through a 12-period MA process of both attempted (in blue) and completed (in red) events, both referring to the submission date (dashed line) and to the event date (continuous line).



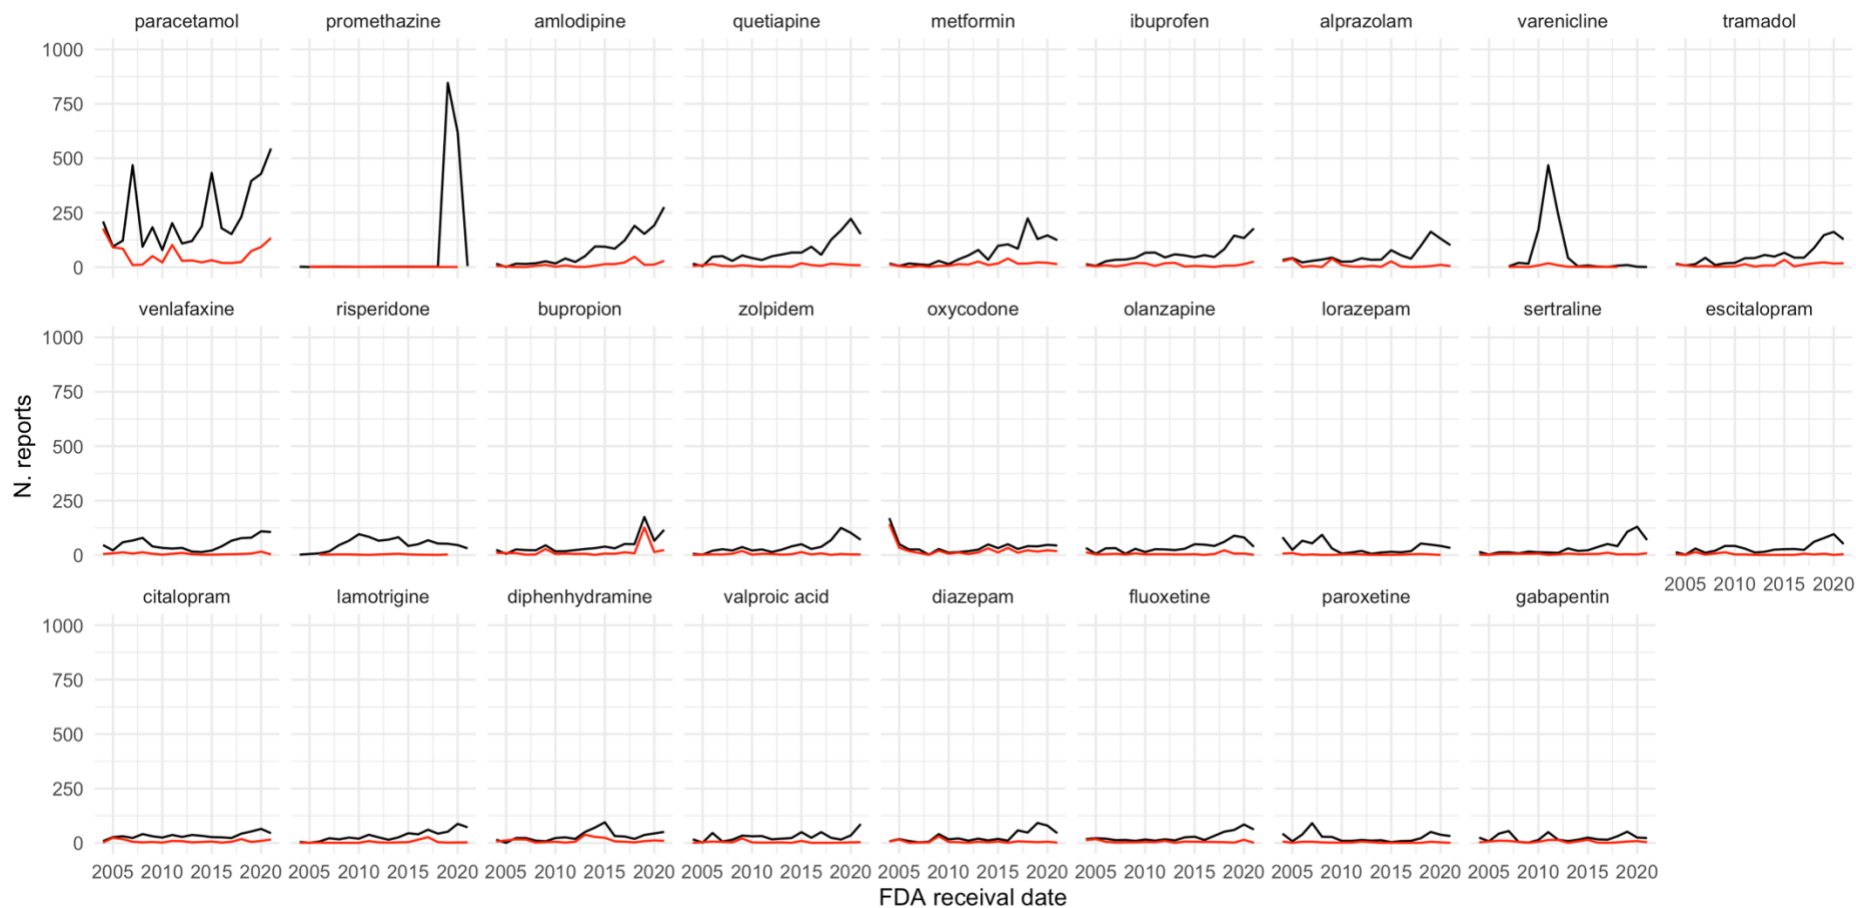

**Figure S4 – Temporal trends.** Temporal trends of suicidal acts (black) and completed suicides (red) are visualized by individual drug for the drugs contributing to more than 1% of the self-poisoning reports.

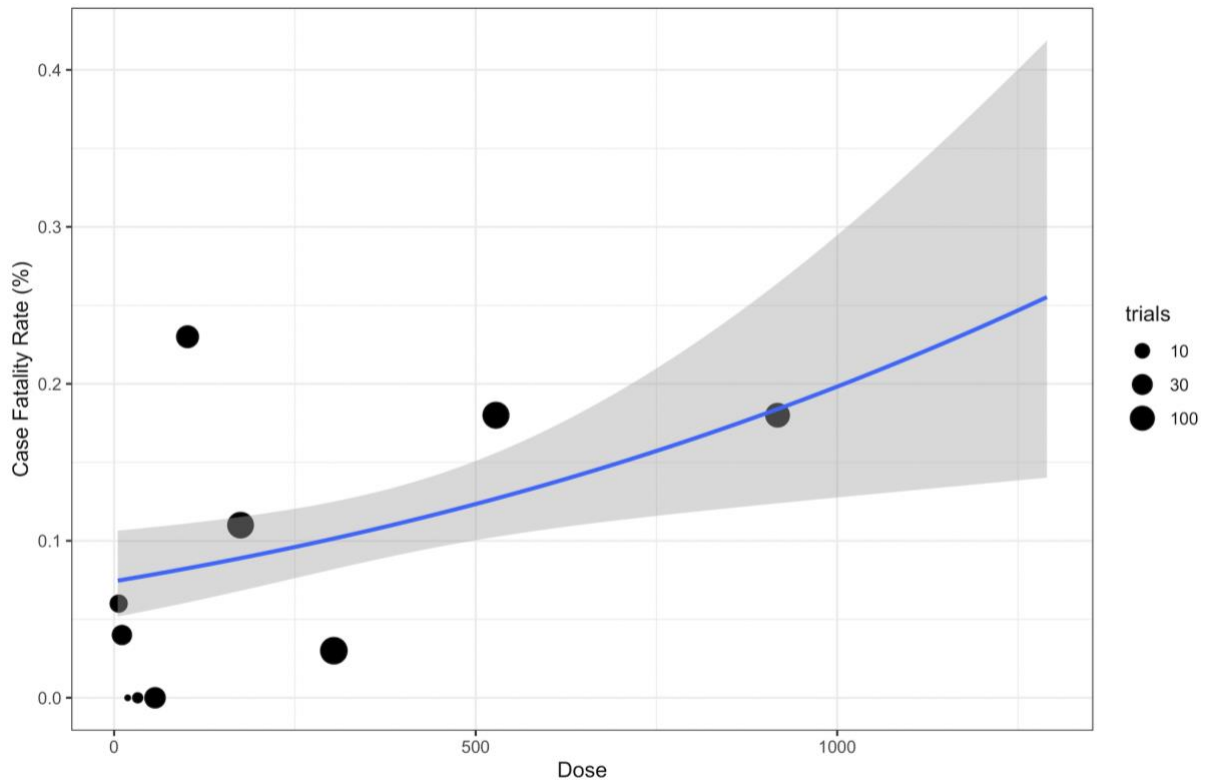

**Figure S5 Lethal dose estimation for amlodipine.** Observational data concerning doses (in milligrams) and fatality was fitted to a logistic model to estimate the lethal dose for different percentages. Reports were then grouped by dose (in logarithmic intervals – narrow near 0 and wider for higher doses – to account for the exposure distribution skewed to the right – i.e., many reports record lower doses, few higher doses–), and the case-fatality rate for each group was calculated. For each dose-interval, we plotted a point over the logistic, with x-coordinate the midpoint between dose limits, y-coordinate the estimated case-fatality rate, and size the logarithm of the number of reports. The pseudo- $R^2$  of the model was 0.66.

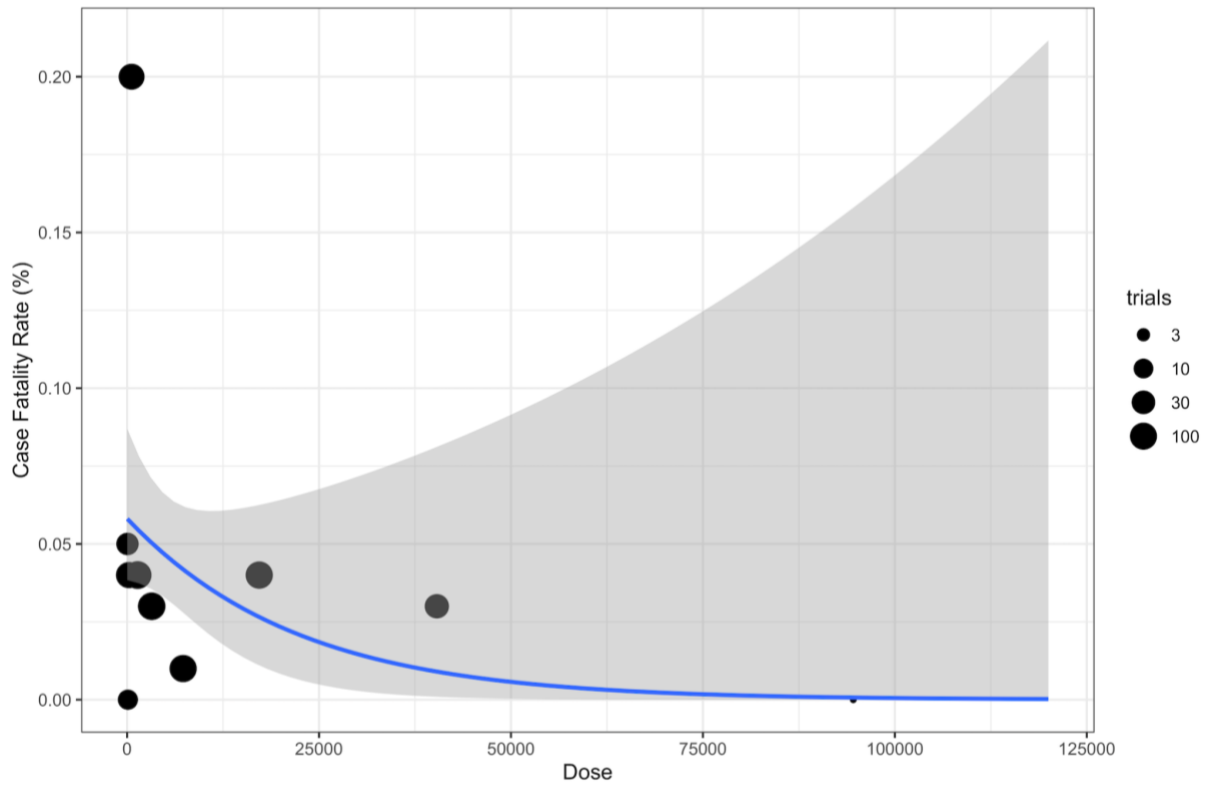

**Figure S6 Lethal dose estimation for quetiapine.** Observational data concerning doses (in milligrams) and fatality was fitted to a logistic model to estimate the lethal dose for different percentages. Reports were then grouped by dose (in logarithmic intervals – narrow near 0 and wider for higher doses – to account for the exposure distribution skewed to the right – i.e., many reports record lower doses, few higher doses–), and the case-fatality rate for each group was calculated. For each dose-interval, we plotted a point over the logistic, with x-coordinate the midpoint between dose limits, y-coordinate the estimated case-fatality rate, and size the logarithm of the number of reports. The pseudo- $R^2$  of the model was 0.07.

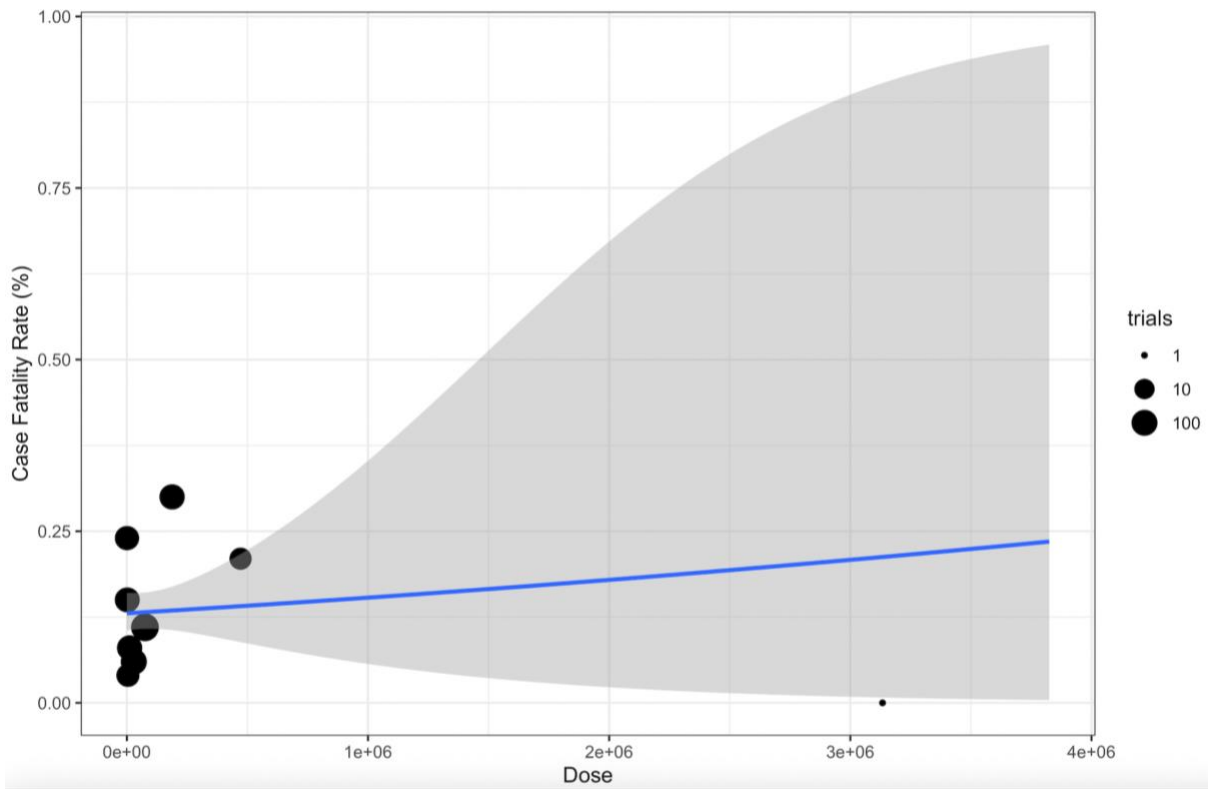

**Figure S7 Lethal dose estimation for metformin.** Observational data concerning doses (in milligrams) and fatality was fitted to a logistic model to estimate the lethal dose for different percentages. Reports were then grouped by dose (in logarithmic intervals – narrow near 0 and wider for higher doses – to account for the exposure distribution skewed to the right – i.e., many reports record lower doses, few higher doses–), and the case-fatality rate for each group was calculated. For each dose-interval, we plotted a point over the logistic, with x-coordinate the midpoint between dose limits, y-coordinate the estimated case-fatality rate, and size the logarithm of the number of reports. The pseudo- $R^2$  of the model was 0.00.
